# Supplementary material for: Functionally Competent, PD-1+ CD8+ Trm Cells Populate the Brain Following Local Antigen Encounter
Source: PubMed Central journal article supplement (PMC7884456; doi:10.3389/fimmu.2020.595707), 2021-02-02
Supplement: DataSheet_1.pdf [file DataSheet_1.pdf]

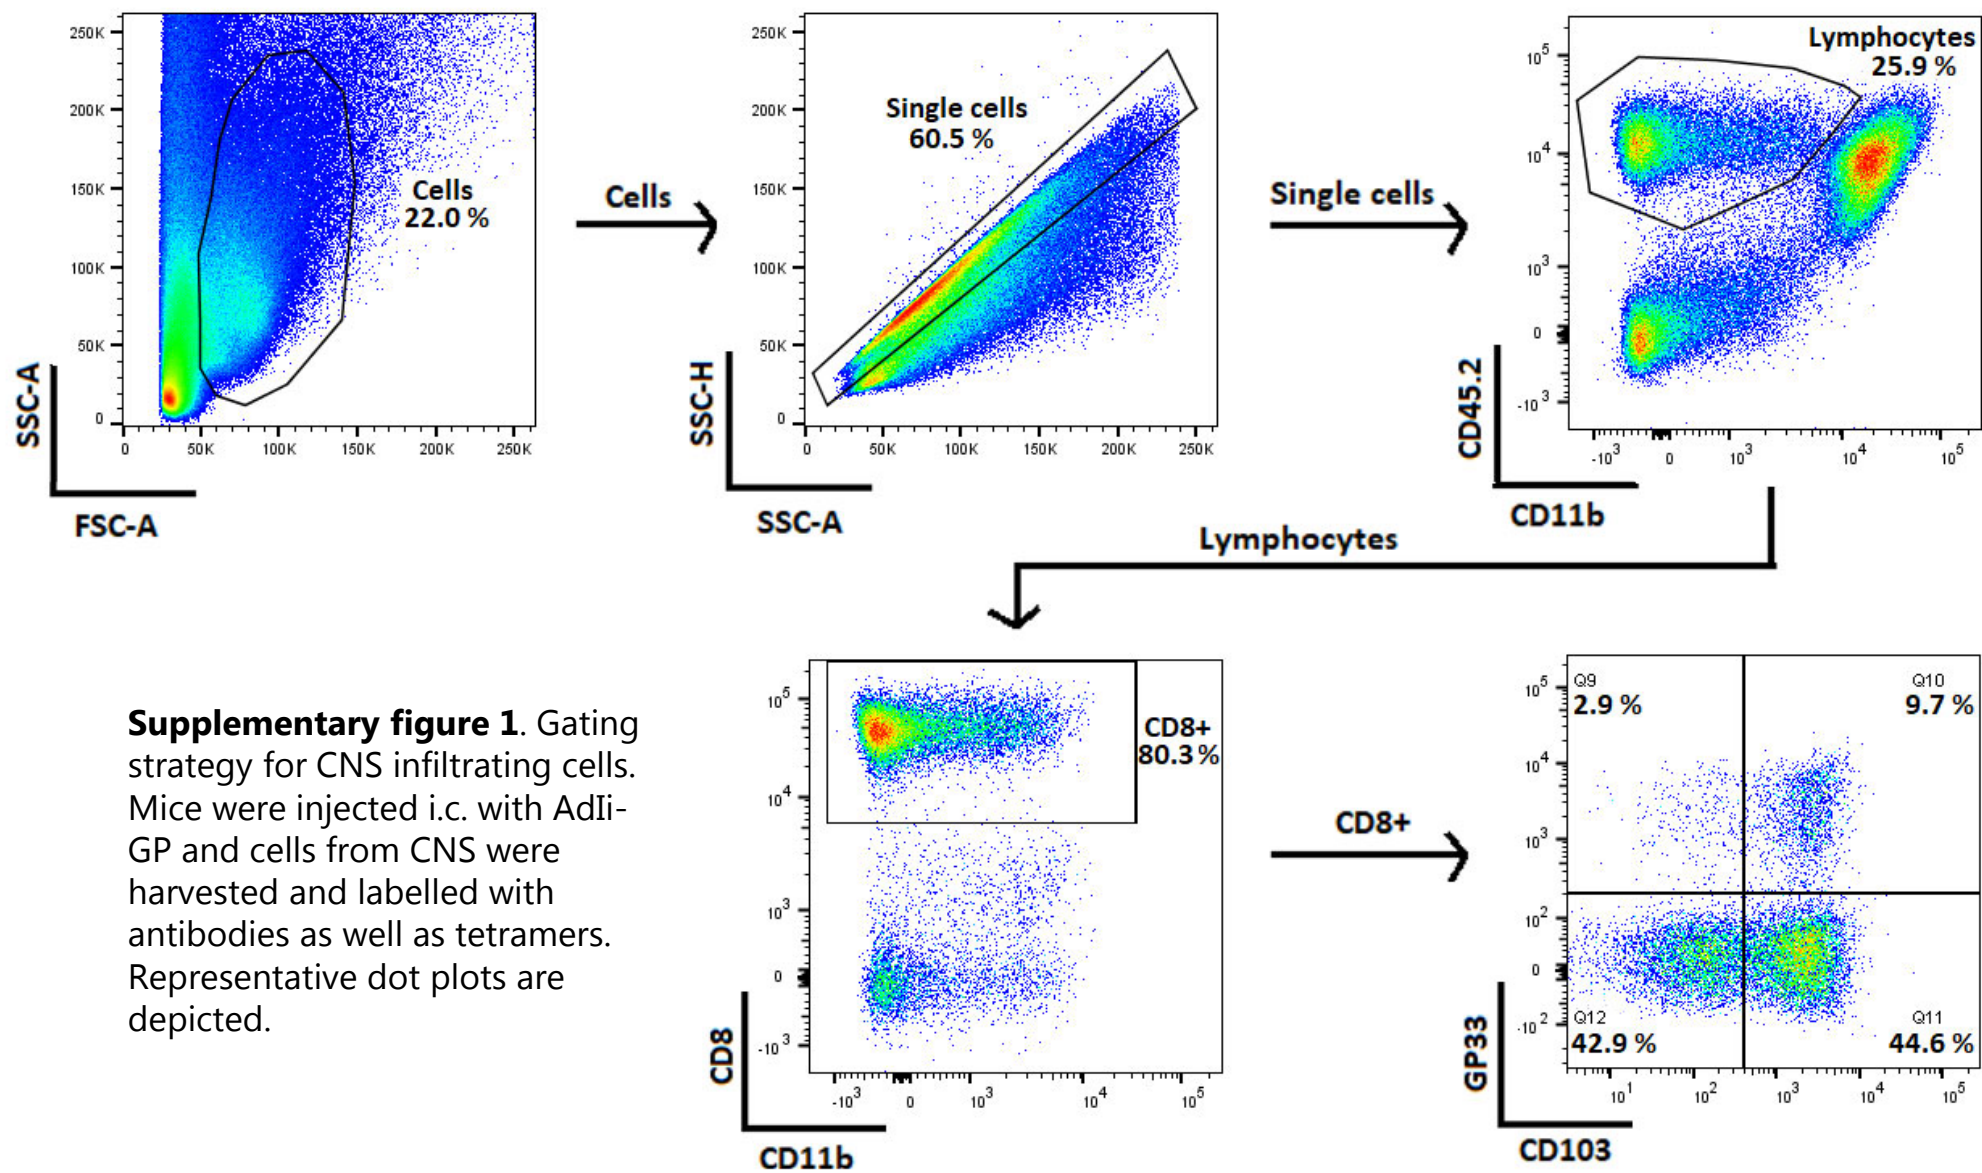

**Supplementary figure 1.** Gating strategy for CNS infiltrating cells. Mice were injected i.c. with AdIi-GP and cells from CNS were harvested and labelled with antibodies as well as tetramers. Representative dot plots are depicted.
