# Supplementary material for: Functionally Competent, PD-1+ CD8+ Trm Cells Populate the Brain Following Local Antigen Encounter
Source: PubMed Central journal article supplement (PMC7884456; doi:10.3389/fimmu.2020.595707), 2021-02-02
Supplement: DataSheet_2.pdf [file DataSheet_2.pdf]

Day 11

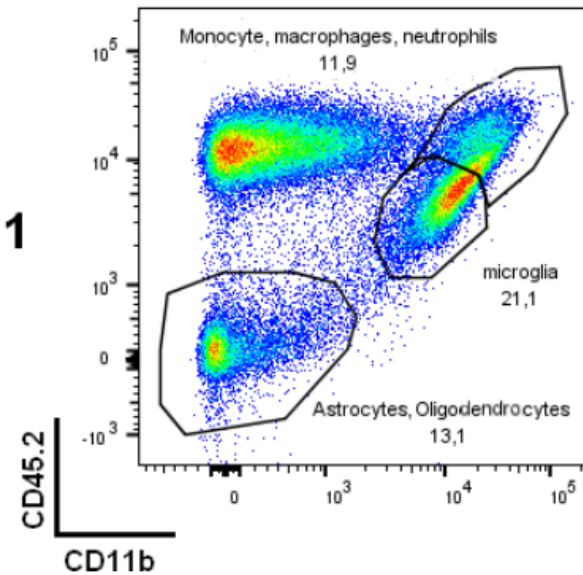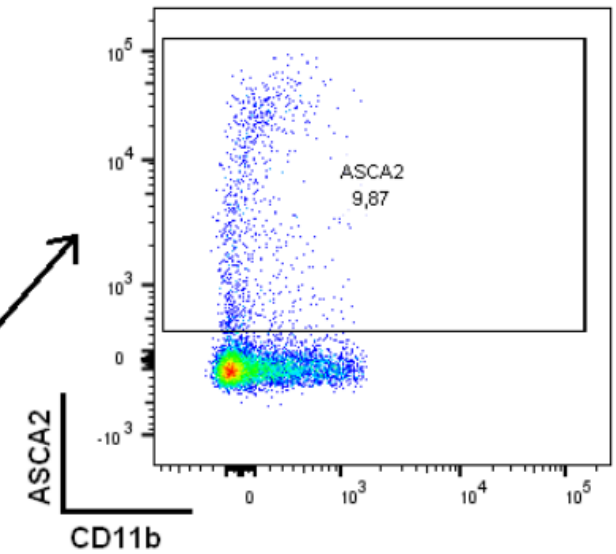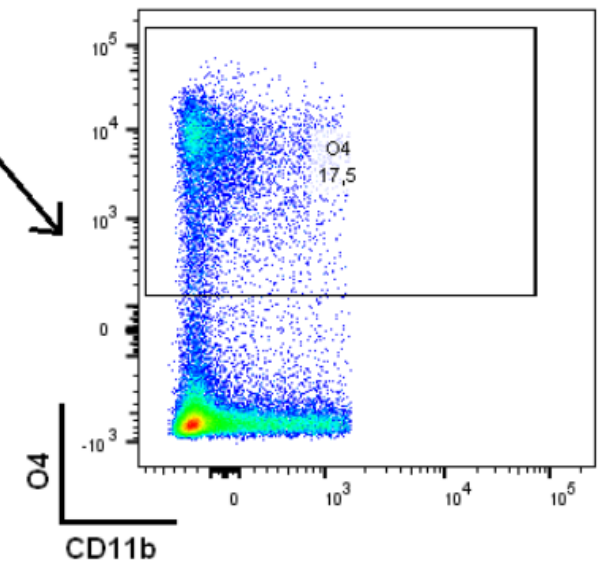

**Supplementary figure 2.** Gating strategy for CNS parenchymal cells. Mice were injected i.c. with AdIi-GP and cells from CNS were gated as indicated. CD45<sup>low</sup>CD11b<sup>low</sup> cells were further subdivided into O4<sup>+</sup> oligodendrocytes and ASCA2<sup>+</sup> astrocytes. Representative dot plots from a mouse inoculated 11 days earlier are depicted.
